# Supplementary material
Source: PubMed Central journal article supplement (PMC29731)
Supplement: nar_29_5_1132__1.pdf [file nar_29_5_1132__1.pdf]

## SUPPLEMENTARY MATERIAL

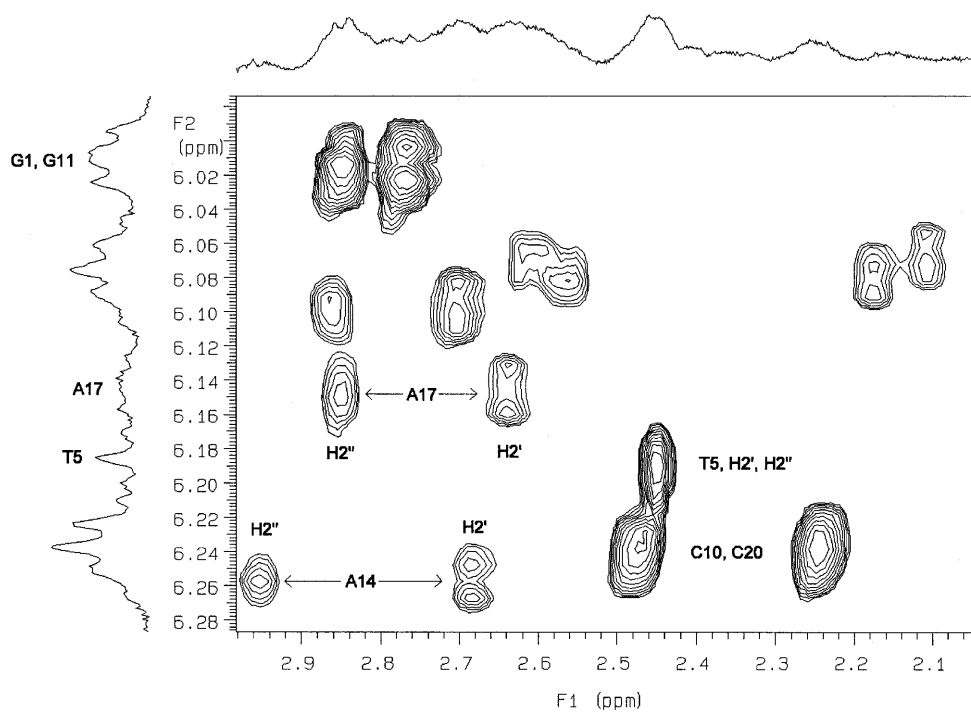

**Figure S1.** Expansion of TOCSY spectrum showing overlap of G1, G11 and C10, C20 resonances and coincidental degeneracy of T5 H2' and H2'' protons at 2.45 p.p.m.

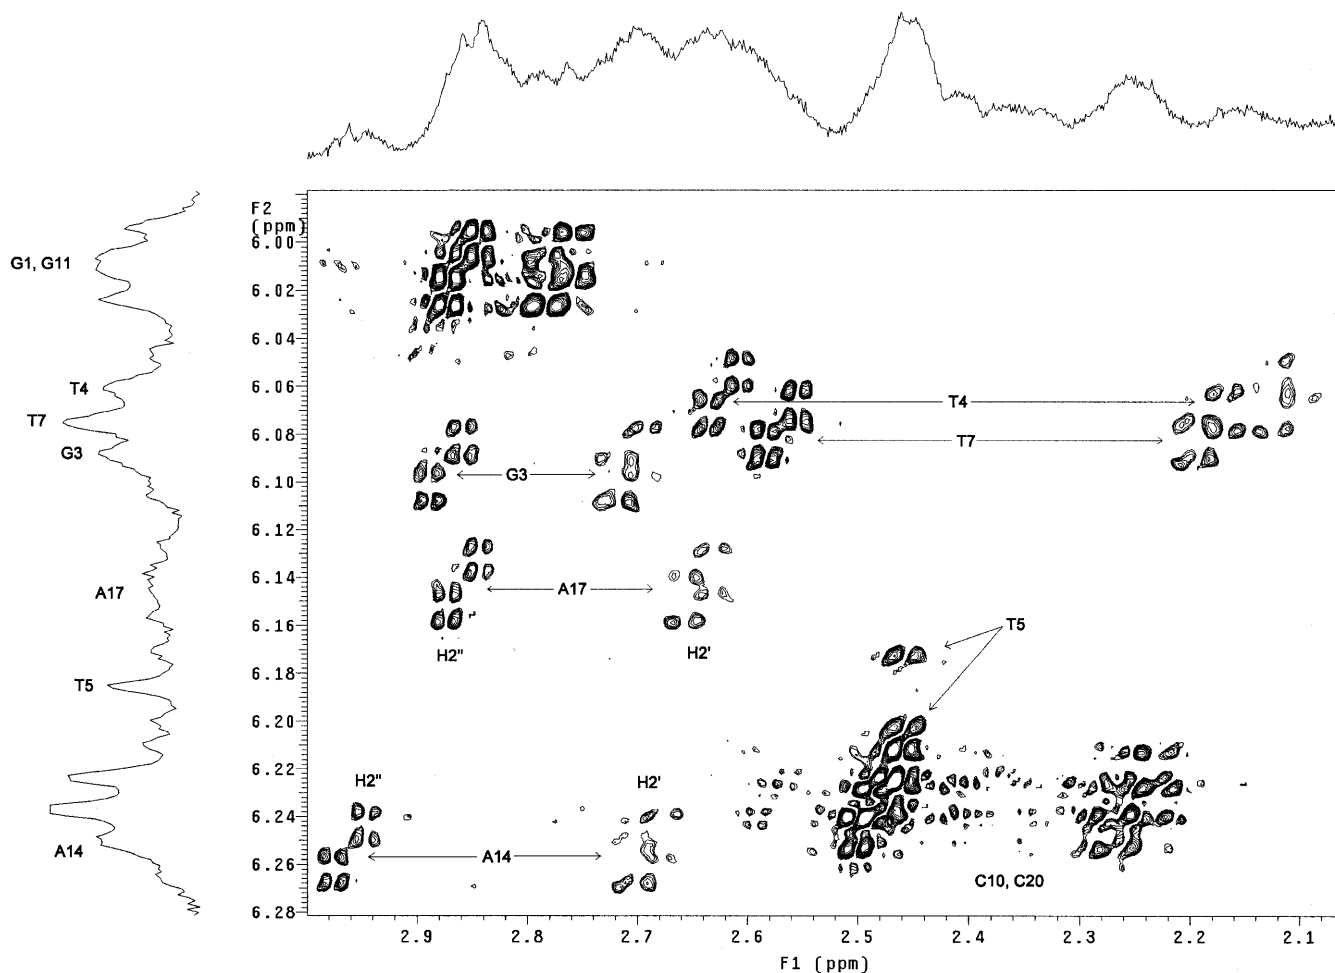

**Figure S2.** Expansion of E-COSY spectrum (as in Fig. S1) showing phase-sensitive patterns used for evaluation of vicinal H1'–H2', H2'' protons. The degeneracy of the cross-peak for T5 prevents determination of  $^3J(\text{H1}', \text{H2}'/\text{H2}'')$  coupling constants. This coupling constant can, however, be estimated from the 1-D spectrum.

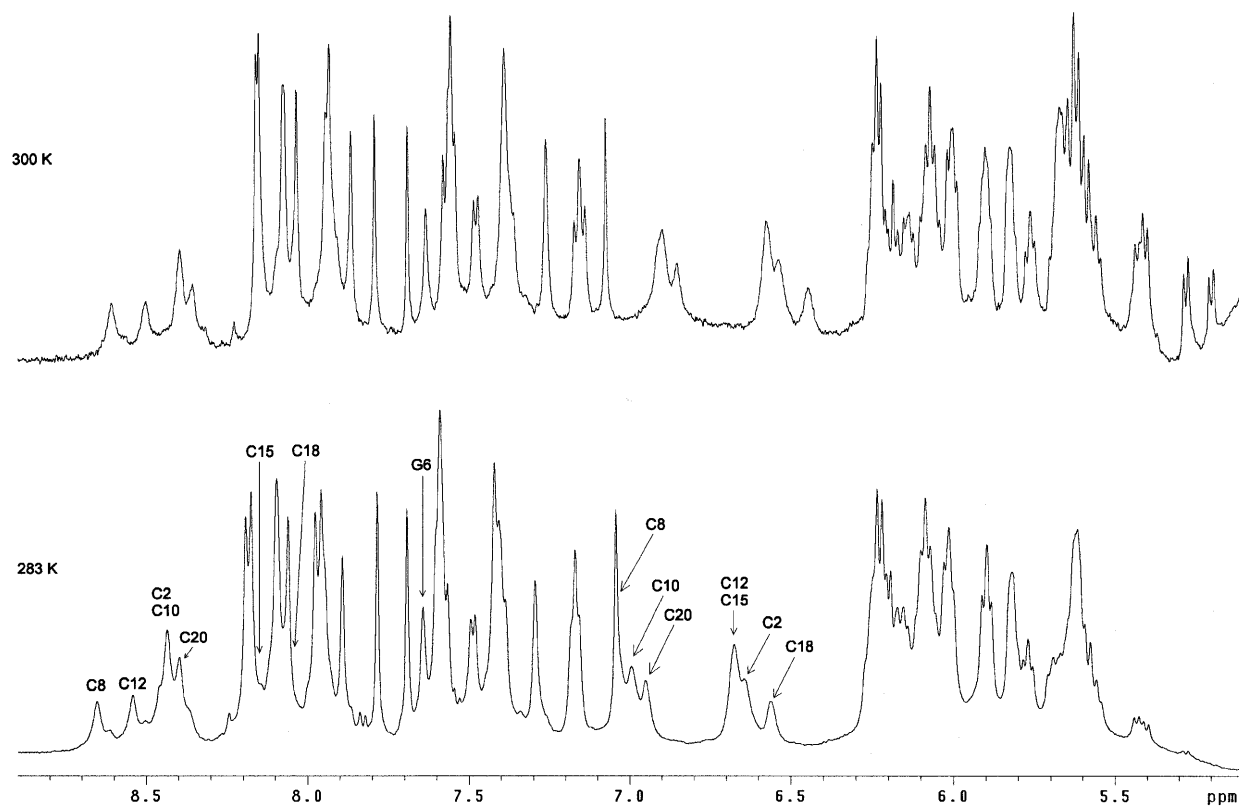

**Figure S3.** Expansions of 1-D spectra of the nicked decamer in K<sup>+</sup> buffer at 10 and 27°C, pH 7.0 (sample 3) showing a negligible shift of the aromatic resonances and ~0.2 p.p.m. shifts of H<sup>F</sup> protons of cytidines to higher frequencies.

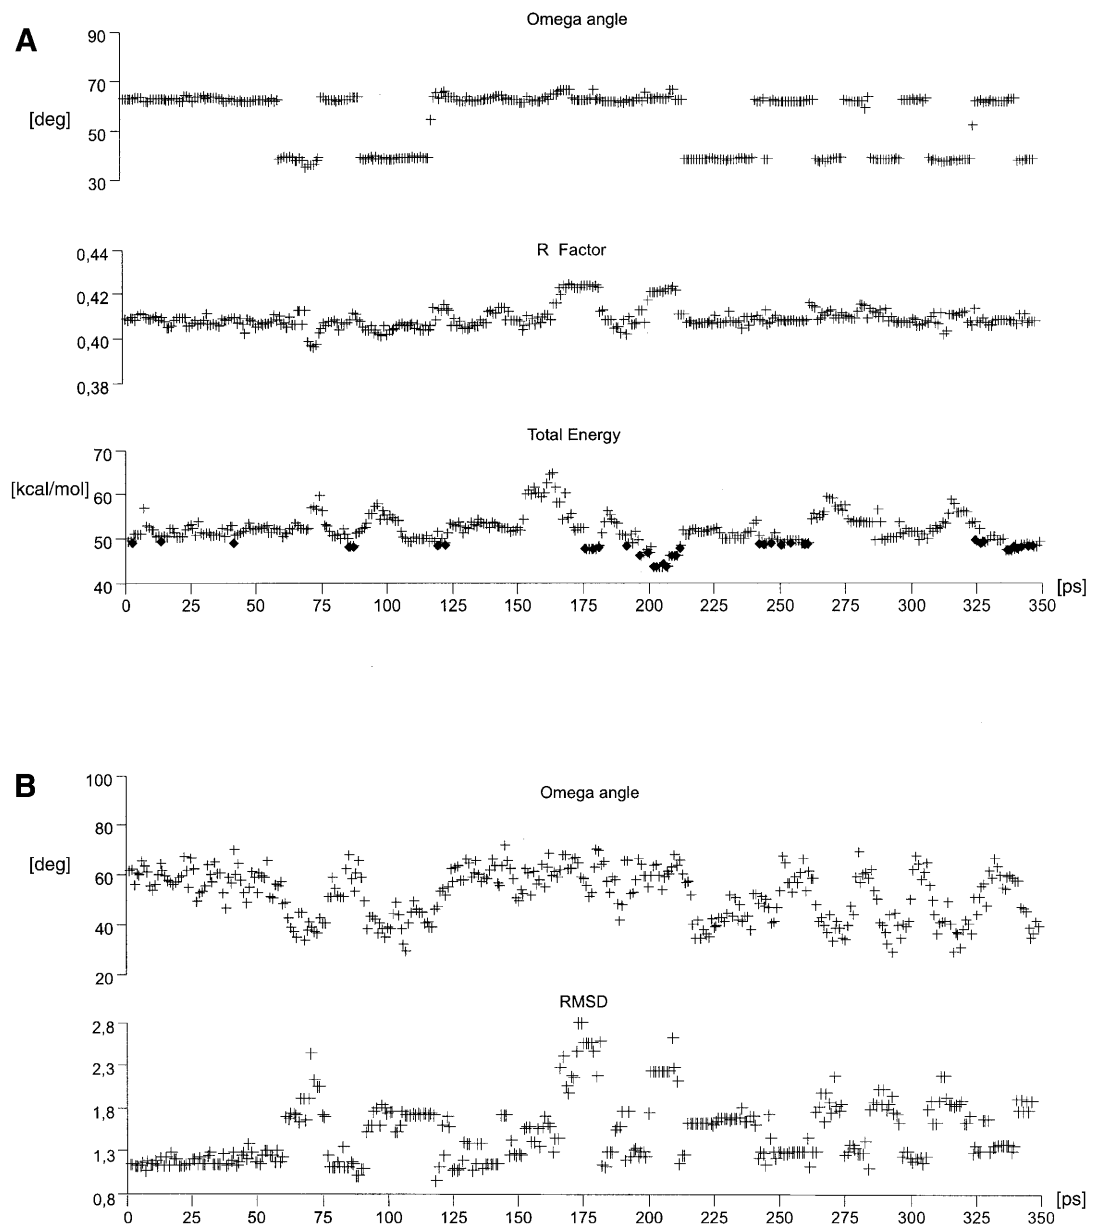

**Figure S4.** The  $\Omega$  angle, R-factor, r.m.s.d. and  $E_{\text{tot}}$  parameters during the MD trajectory. (A) After EM, the conformations marked with closed diamonds were used for discussion of structural features, and (B) the original MD run.

**Table S1.** 1-H and 31-P chemical shifts  $\delta$  (p.p.m. of decamer tethered with PEG<sub>6</sub>)<sup>a</sup>

|     | H1'  | H2'  | H2'' | H3'  | H4'  | H6/8 | H2/5/Me | NH    | NH <sub>2</sub><br>H <sup>B</sup> | H <sup>F</sup> | <sup>31</sup> P           |
|-----|------|------|------|------|------|------|---------|-------|-----------------------------------|----------------|---------------------------|
| G1  | 6.01 | 2.76 | 2.85 | 4.96 | 4.34 | 8.07 |         | 13.23 |                                   |                | +0.10                     |
| C2  | 5.68 | 2.14 | 2.46 | 4.86 | 4.22 | 7.39 | 5.40    |       | 8.44                              | 6.64           | -1.50                     |
| G3  | 6.09 | 2.69 | 2.85 | 5.02 | 4.44 | 7.94 |         | 12.96 |                                   |                | -0.83                     |
| T4  | 6.06 | 2.10 | 2.62 | 4.88 | 4.27 | 7.26 | 1.45    | 14.0  |                                   |                | -1.27                     |
| T5  | 6.19 | 2.44 | 2.44 | 4.68 | 4.04 | 7.39 | 1.67    | 13.34 |                                   |                | -1.36                     |
| G6  | 5.83 | 2.64 | 2.64 | 4.66 | 4.18 | 7.63 |         | 12.51 |                                   |                |                           |
| T7  | 6.07 | 2.17 | 2.56 | 4.87 | 4.32 | 7.56 | 1.16    | 13.83 |                                   |                | -1.46                     |
| C8  | 5.76 | 2.05 | 2.42 | 4.87 | 4.13 | 7.47 | 5.64    |       | 8.65                              | 7.03           |                           |
| G9  | 5.91 | 2.61 | 2.69 | 5.00 | 4.35 | 7.93 |         | 13.13 |                                   |                | -1.09                     |
| C10 | 6.24 | 2.23 | 2.46 | 4.85 | 4.20 | 7.58 | 5.61    |       | 8.43                              | 6.99           | -0.92(-0.59) <sup>b</sup> |
| G11 | 6.00 | 2.76 | 2.85 | 4.96 | 4.34 | 8.08 |         | 13.29 |                                   |                | +0.10                     |
| C12 | 5.67 | 2.01 | 2.39 | 4.85 | 4.18 | 7.37 | 5.43    |       | 8.54                              | 6.68           | -1.57                     |
| G13 | 5.66 | 2.72 | 2.82 | 5.04 | 4.39 | 7.92 |         | 12.91 |                                   |                | -0.95                     |
| A14 | 6.25 | 2.67 | 2.95 | 5.03 | 4.49 | 8.15 | 7.79    |       |                                   |                | -1.19                     |
| C15 | 5.56 | 1.91 | 2.35 | 4.76 | 4.13 | 7.15 | 5.28    |       | 8.18                              | 6.68           |                           |
| A16 | 5.83 | 2.58 | 2.81 | 5.01 | 4.34 | 8.03 | 7.07    |       |                                   |                | -1.33                     |
| A17 | 6.14 | 2.64 | 2.85 | 5.04 | 4.46 | 8.16 | 7.69    |       |                                   |                | -1.28                     |
| C18 | 5.62 | 1.84 | 2.28 | 4.80 | 4.13 | 7.17 | 5.19    |       | 8.08                              | 6.56           |                           |
| G19 | 5.89 | 2.61 | 2.69 | 4.99 | 4.35 | 7.86 |         | 13.04 |                                   |                | -1.17                     |
| C20 | 6.22 | 2.24 | 2.48 | 4.85 | 4.20 | 7.54 | 5.58    |       | 8.40                              | 6.95           | -0.92(-0.59) <sup>b</sup> |

<sup>a</sup>Data were acquired on a sample in H<sub>2</sub>O/D<sub>2</sub>O (9:1), potassium buffer pH 7.0 (sample 3) with TSP-d<sub>4</sub> as internal standard. The  $\delta$  values for non-exchangeable protons were taken from spectra at 27°C and for exchangeable protons at 10°C. The <sup>31</sup>P atoms are assigned to the 5'-end of each base. Their chemical shifts were acquired on sample 2. Unassigned signals ( $\delta = -0.92; -1.32; -1.48$  p.p.m.) are all correlated to three H4' protons having identical chemical shift, 4.13 p.p.m.

<sup>b</sup>Linker side, 3'-end.

**Table S2.** Vicinal coupling constants <sup>3</sup>J(H,H) (Hz), <sup>3</sup>J(<sup>13</sup>C,<sup>31</sup>P) (Hz) and <sup>1</sup>H T<sub>1</sub> (s) relaxation times for PEG<sub>6</sub> tethered decamer<sup>a</sup>

|                                                                | G1                | C2          | G3           | T4           | T5                | G6           | T7           | C8          | G9           | C10               |
|----------------------------------------------------------------|-------------------|-------------|--------------|--------------|-------------------|--------------|--------------|-------------|--------------|-------------------|
| <sup>3</sup> J(H1',H2')                                        | 9.84              | 9.40        | 9.44         | 8.60         | 7.50 <sup>b</sup> | <sup>c</sup> | 8.40         | 8.58        | 9.00         | 8.00              |
| <sup>3</sup> J(H1',H2'')                                       | 5.60              | 5.50        | 5.80         | 6.00         | 7.50 <sup>b</sup> | <sup>c</sup> | 6.20         | 6.00        | 6.20         | 6.45              |
| <sup>3</sup> J(H3',H2')                                        | 6.10              | 6.85        | 5.60         | 7.20         |                   |              | 6.55         | 7.20        | 5.80         | 7.00              |
| <sup>3</sup> J(H3',H2'')                                       | 3.30              | 2.15        | 2.10         | 2.30         |                   |              | 2.50         | 2.65        | 2.30         | 3.71              |
| <sup>3</sup> J( <sup>13</sup> C, <sup>31</sup> P) <sup>f</sup> | 10.70; 9.20       | 9.30; 11.0  | 8.30; 10.20  | 11.40; 11.00 | 10.80             | 11.30        | 12.80; 12.30 | 10.90; 9.20 | 11.10; 9.80  |                   |
| T <sub>1</sub> (H6/H8)                                         | 1.25              | 1.31        | 1.45         | 1.59         | 1.43              | 1.14         | 1.33         | 1.27        | 1.28         | 1.29              |
|                                                                | C20               | G19         | C18          | A17          | A16               | C15          | A14          | G13         | C12          | G11               |
| <sup>3</sup> J(H1',H2')                                        | 8.00 <sup>d</sup> | 9.00        | 8.40         | 9.35         | 9.70              | 8.10         | 9.12         | 9.90        | 9.10         | 9.84 <sup>e</sup> |
| <sup>3</sup> J(H1',H2'')                                       | 6.45 <sup>d</sup> | 6.20        | 6.20         | 5.70         | 5.60              | 6.30         | 5.80         | 5.60        | 5.80         | 5.60 <sup>e</sup> |
| <sup>3</sup> J(H3',H2')                                        | 7.00              | 5.80        | 7.70         | 5.90         | 5.60              | 7.80         | 6.00         | 5.60        | 7.50         | 6.10              |
| <sup>3</sup> J(H3',H2'')                                       | 3.81              | 2.30        | 2.60         | 2.10         | 2.16              | 2.43         | 2.10         | 2.00        | 2.60         | 3.30              |
| <sup>3</sup> J( <sup>13</sup> C, <sup>31</sup> P) <sup>f</sup> |                   | 11.10; 9.80 | 11.70; 11.10 | 11.60; 12.20 | 9.20; 11.50       | 11.30; 11.40 | 10.60; 11.50 | 9.90; 10.10 | 11.50; 10.40 | 10.70; 9.20       |
| T <sub>1</sub> (H6/H8)                                         | 1.28              | 1.52        | 1.58         | 1.61         | 1.55              | 1.66         | 1.69         | 1.11        | 1.28         | 1.25              |

<sup>a</sup>Coupling constant data were acquired in D<sub>2</sub>O at 27°C (sample 2). The relaxation times were acquired in D<sub>2</sub>O solution (sample 1) at 27°C.

<sup>b</sup>From a 1-D spectrum.

<sup>c</sup>Not determined due to coincidence of H2' and H2'' chemical shifts and lack of cross-peak.

<sup>d</sup>Taken as for G10, assumed to be equal due to nearly complete overlap of the signals.

<sup>e</sup>Taken as for G1, assumed to be equal due to complete overlap of the signals.

<sup>f</sup>The <sup>3</sup>J(C,P) values are given for carbon C-4'. The coupling constants are not assigned to 5' and 3' side P atoms. At the nick, one of the coupling constants is missing.
